# Supplementary material for: β1D integrin splice variant stabilizes integrin dynamics and reduces integrin signaling by limiting paxillin recruitment
Source: Oxford University Press journal article supplement (doi:10.1242/jcs.224493), 2019-03-19
Supplement: jcs224493supp.pdf [file jcs224493supp.pdf]

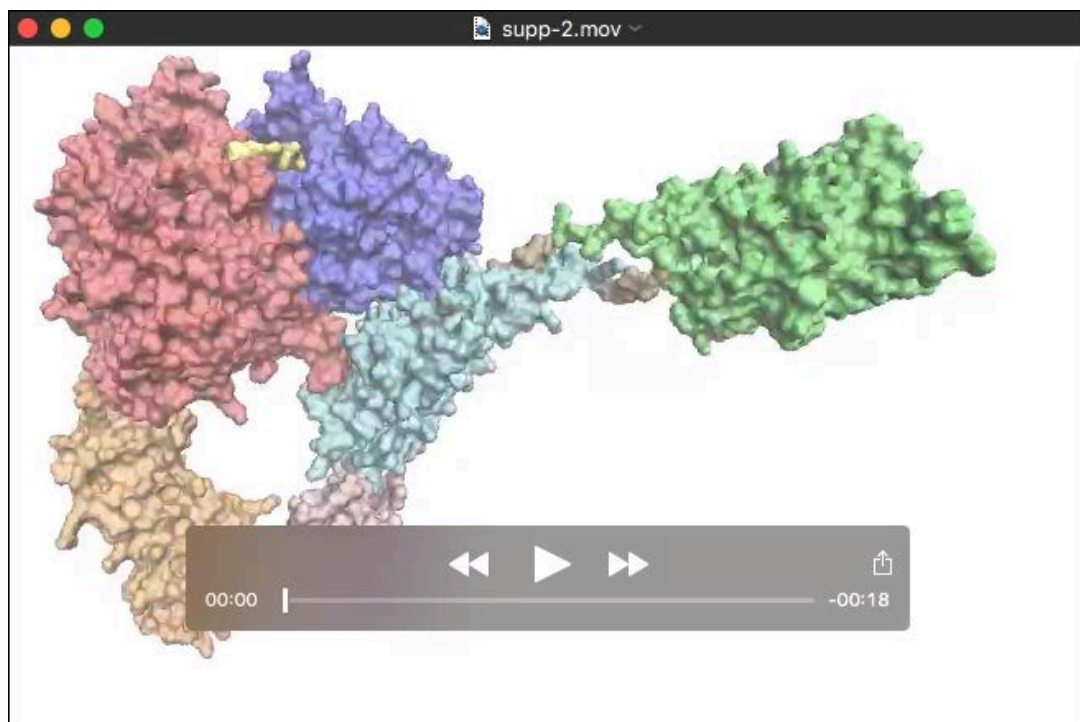

**Movie 1** (.mov) to Fig. 1G (structural model of the extracellular tagged GFP-β1-integrin fusion protein). The animation gives a 3D impression of the GFP-tagged (green) ligand-binding domain of α5β1-integrin (RGD-peptide in yellow). Model based on the ligand-binding extracellular fragment of α5β1 corresponding to 3VI4, and green fluorescent protein (GFP) corresponding to 1C4F.

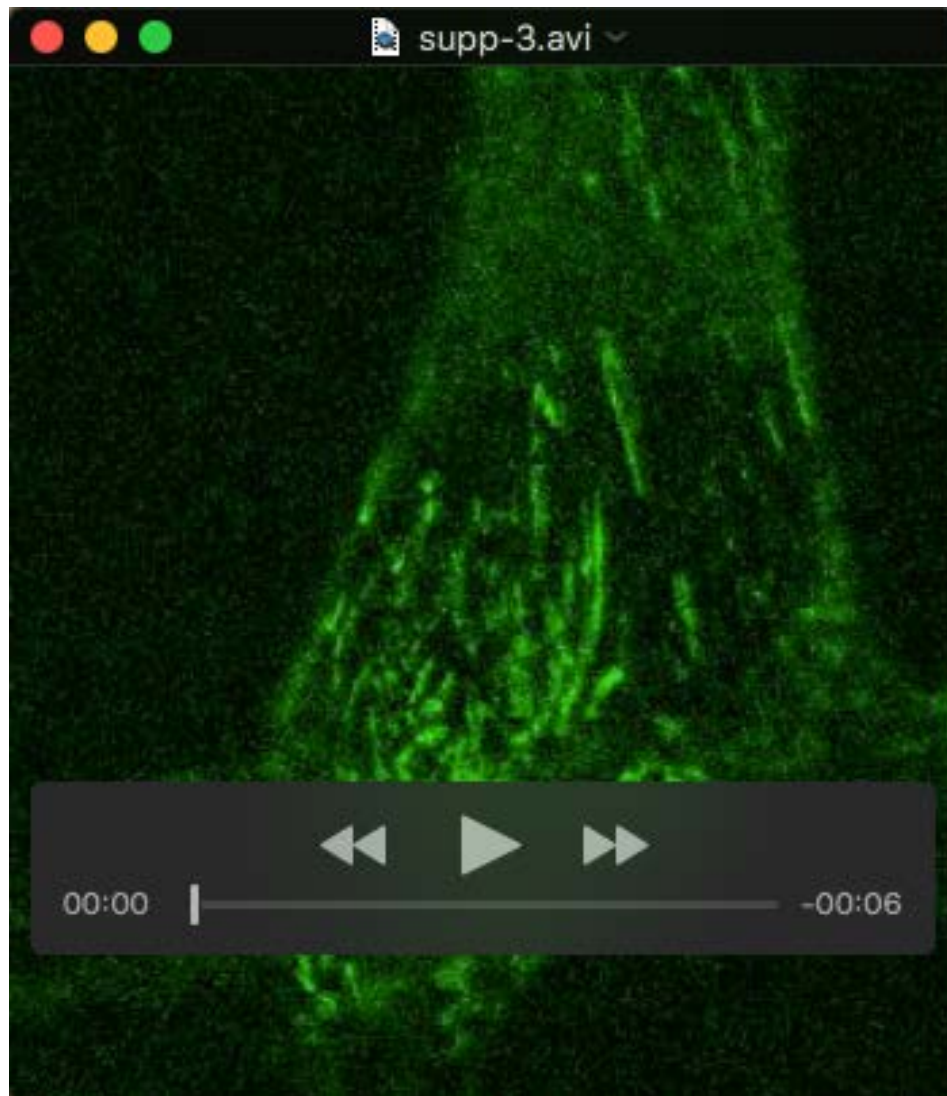

**Movie 2** (.avi) to support Fig. 3D. C2C12 cell transiently expressing the GFP- $\beta$ 1D-integrin construct for 72 hrs. Although the recovery of bleached GFP- $\beta$ 1D-integrin structures on the surface of that cell is very slow, the individual GFP-positive fibers move on the surface of the cell (40 seconds between frames).

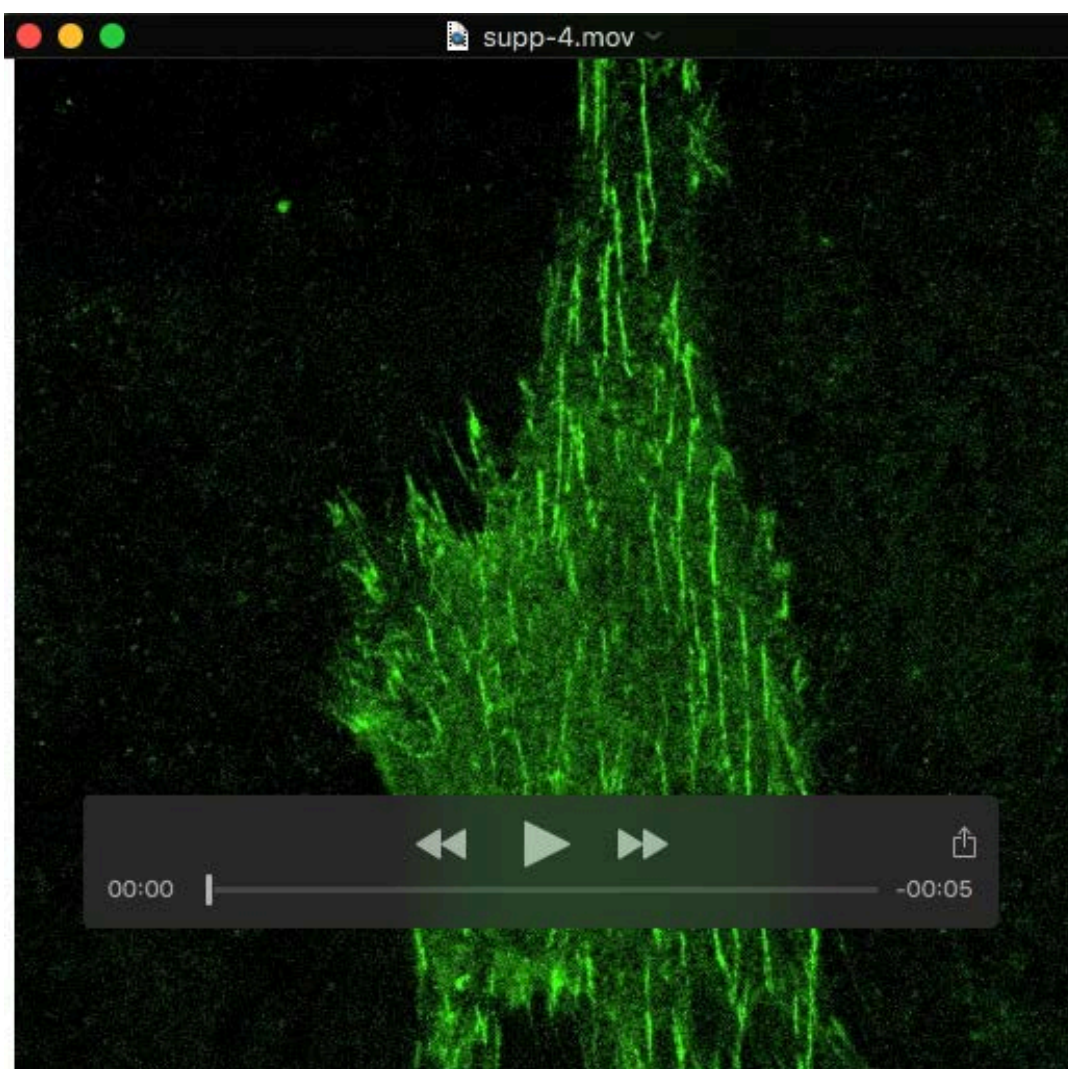

**Movie 3** (.mov) to support Fig. 5A. Transiently transfected 3T3 cell expressing the GFP- $\beta$ 1A-integrin construct for 72 hrs. Fluorescent structures are bleached and recovery can be observed over time (40 seconds between frames).



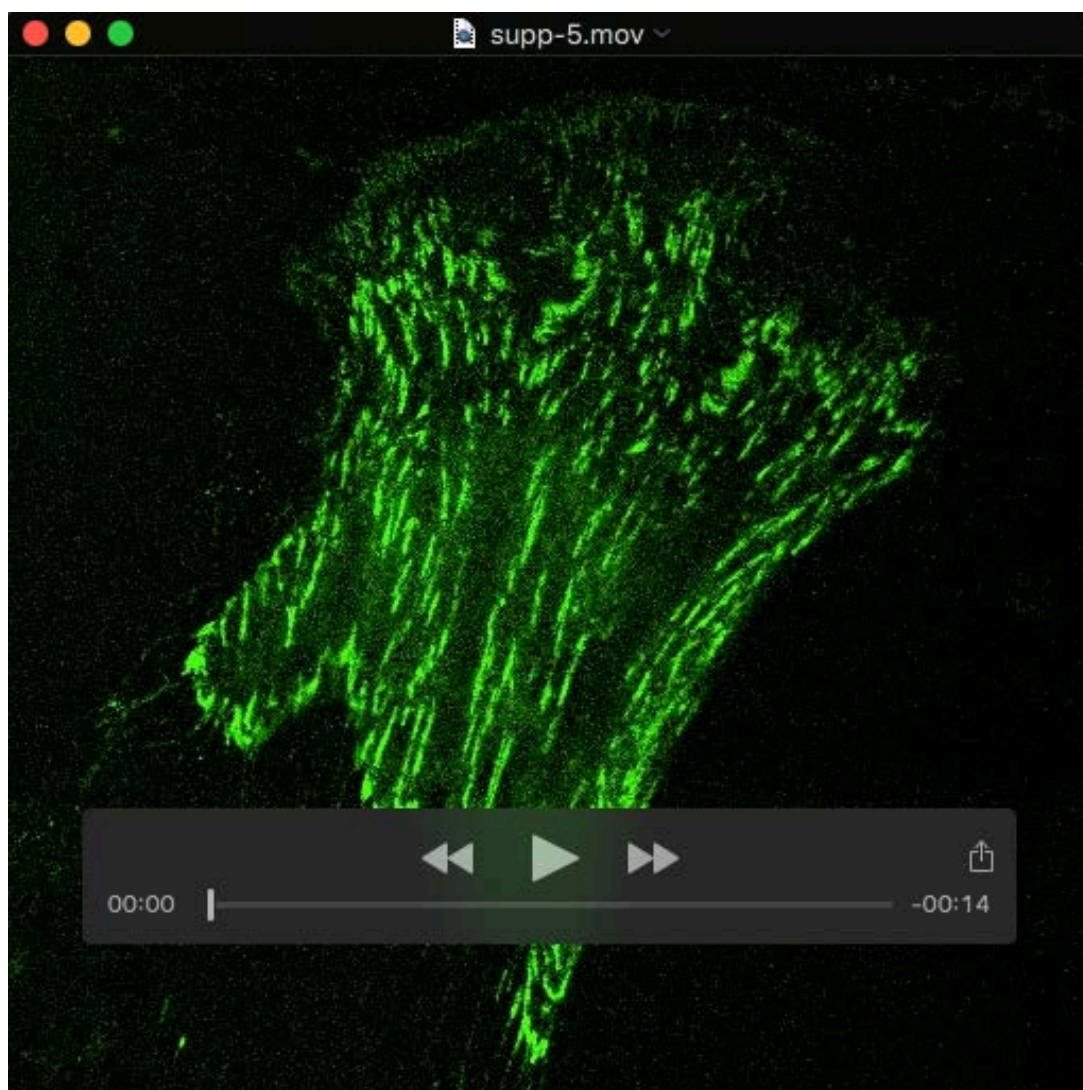

**Movie 4** (.mov) to support Fig. 5B. Transiently transfected 3T3 cell expressing the GFP- $\beta$ 1D-integrin construct for 72 hrs. Fluorescent structures are bleached and recovery can be observed over time (40 seconds between frames).

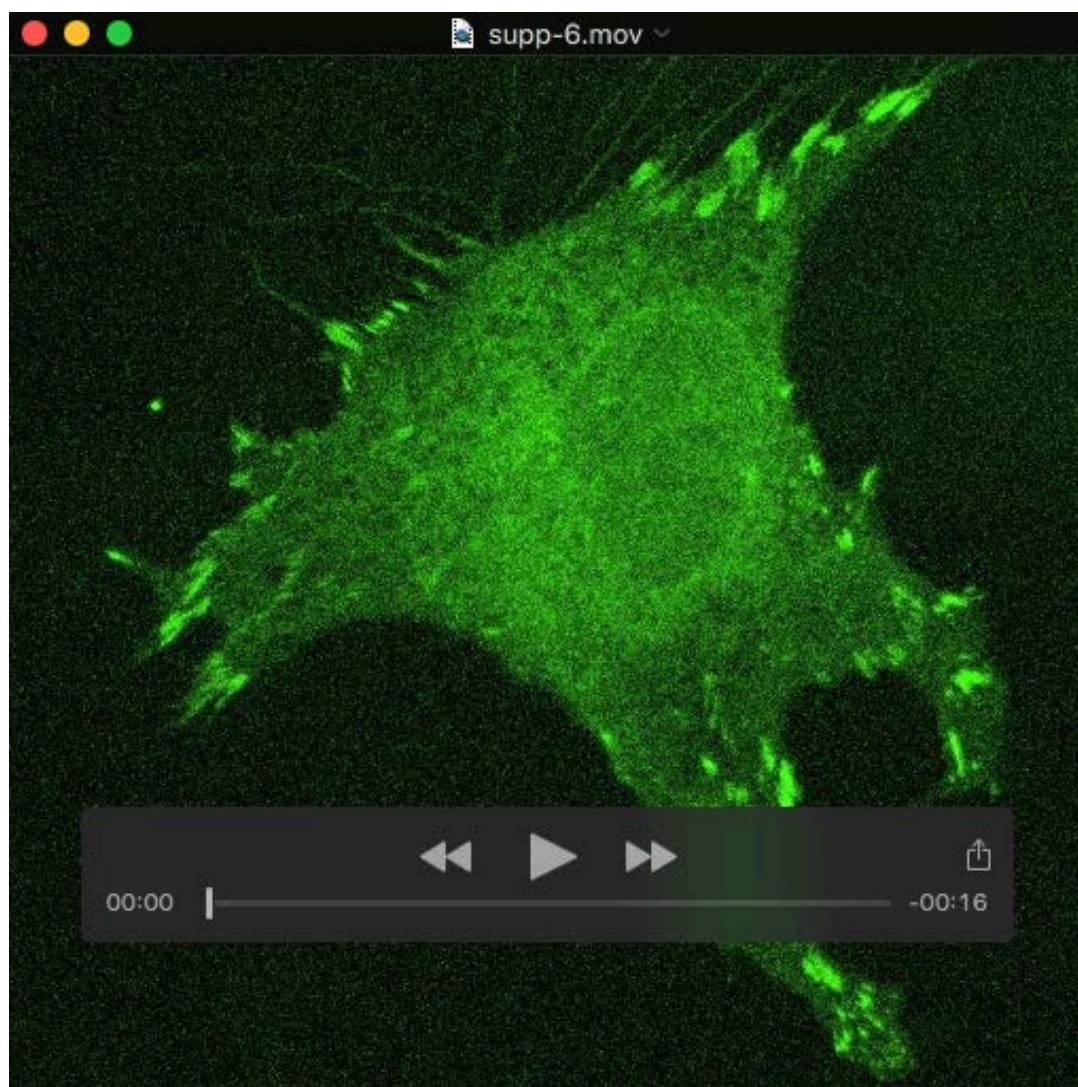

**Movie 5** (.mov) to support Fig. 5C. Transiently transfected 3T3 cell expressing the GFP- $\beta$ 1D-P786A-mutant-integrin construct for 72 hrs. Fluorescent structures are bleached and recovery can be observed over time (40 seconds between frames).



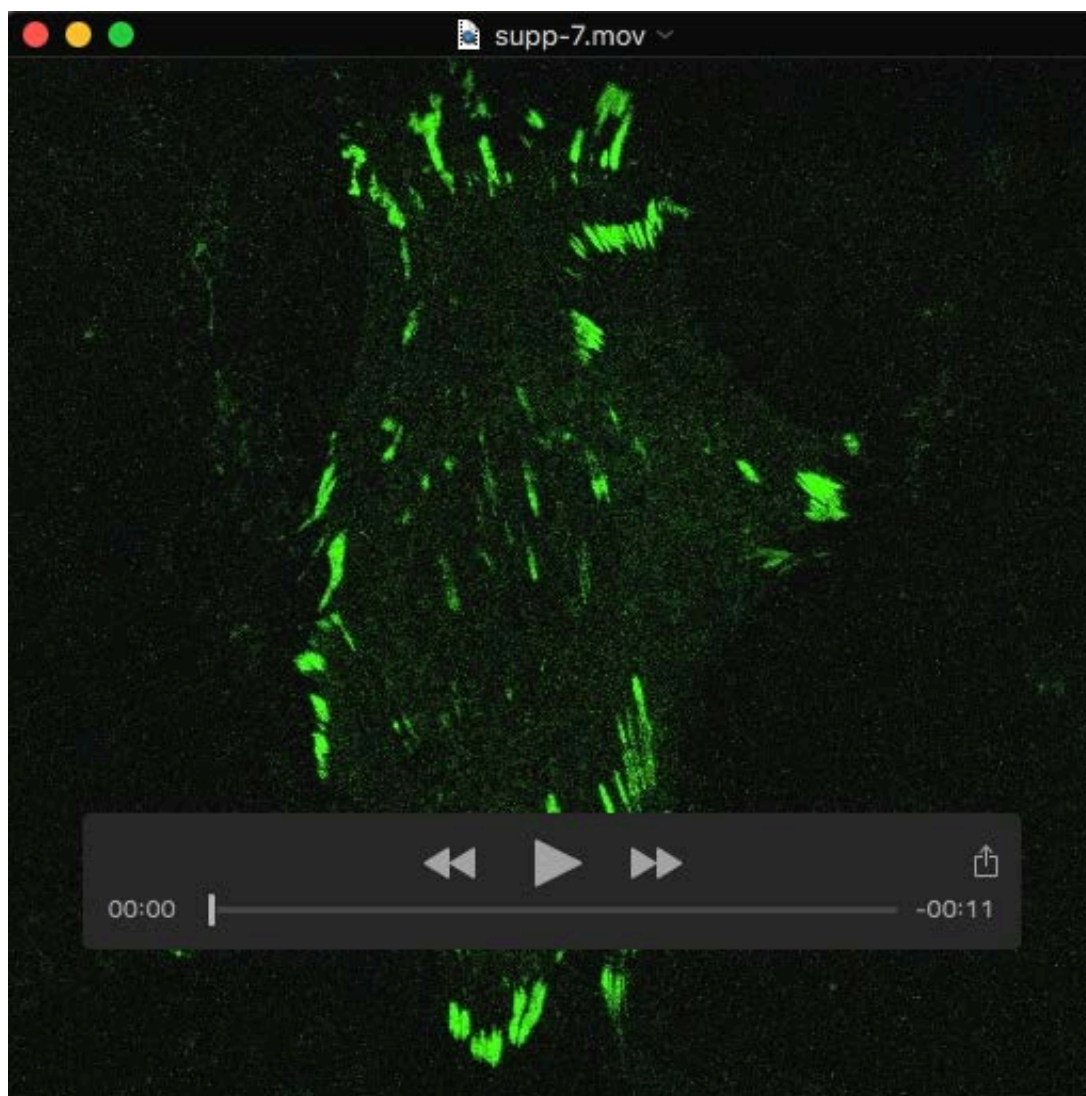

**Movie 6** (.mov) to support Fig. 5D. Transiently transfected 3T3 cell expressing the  $\beta 3$ -GFP-integrin construct for 72 hrs. Fluorescent structures are bleached and recovery can be observed over time (40 seconds between frames).

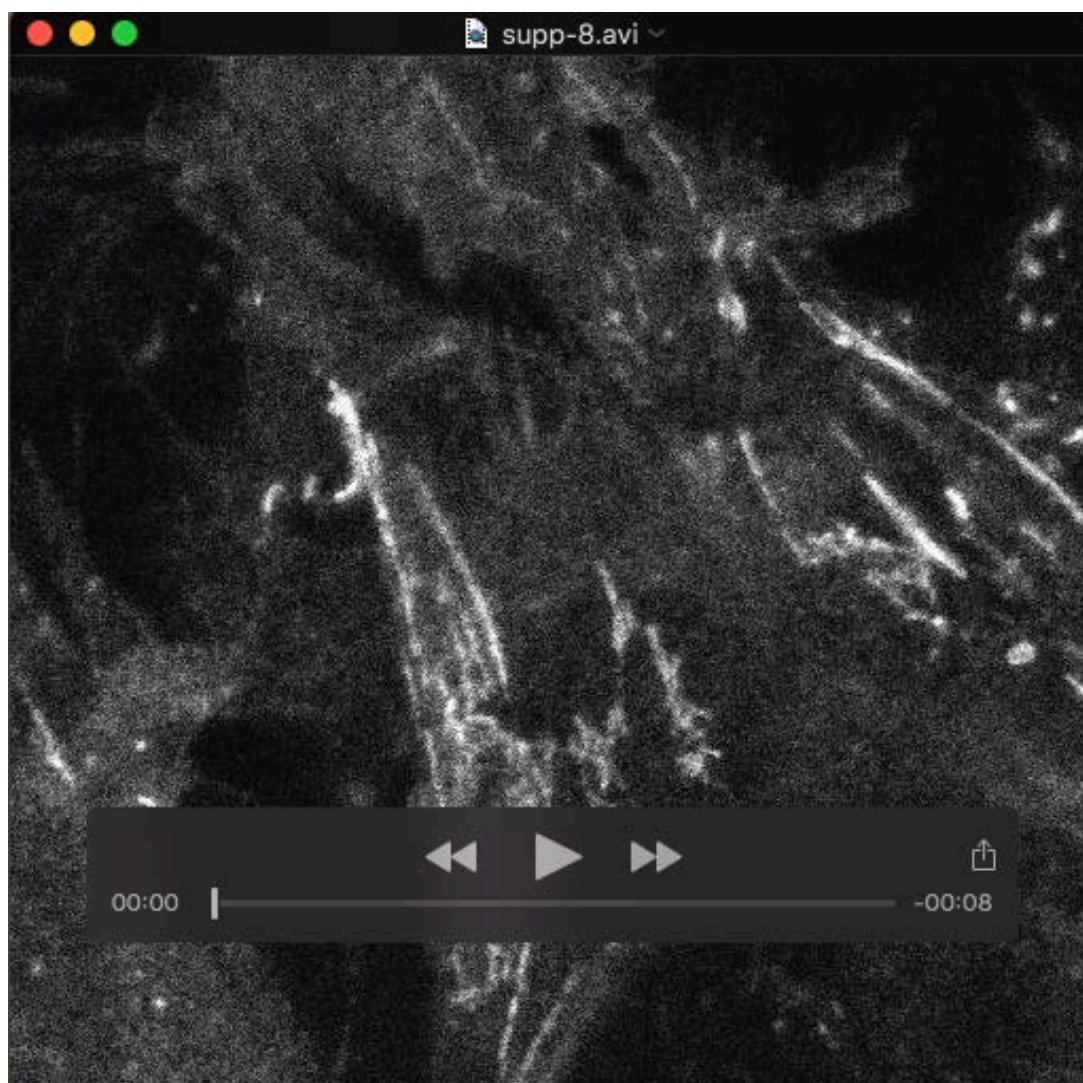

**Movie 7** (.avi) to support Fig. 5F. Representative example of a stably transfected GD25 cell expressing the GFP- $\beta$ 1A-integrin construct. Fluorescent structures are bleached and recovery was followed over time to establish the data in Fig. 5F (20 seconds between frames. Width of field 53 $\mu$ m).

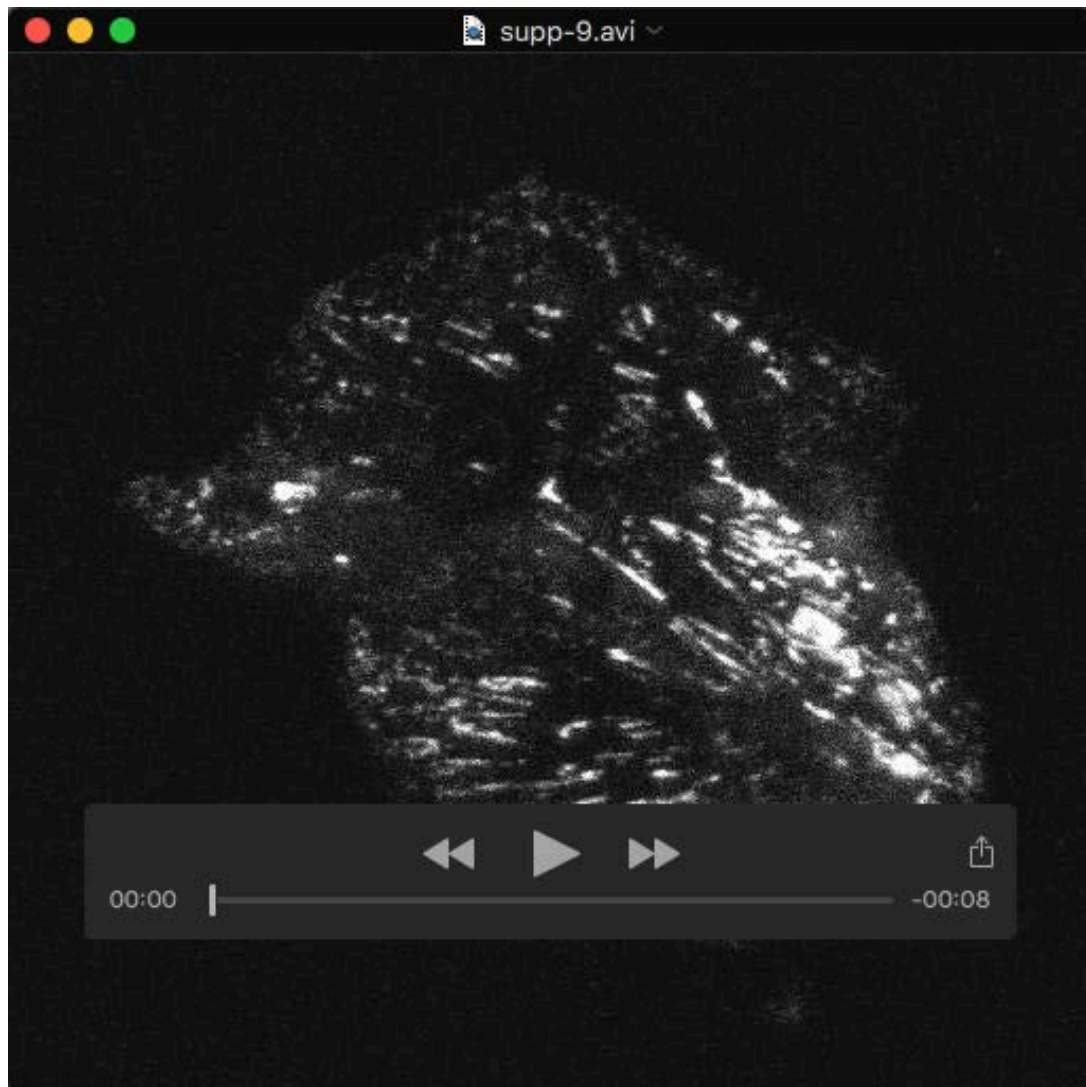

**Movie 8** (.avi) to support Fig. 5F. Representative example of a stably transfected GD25 cell expressing the GFP- $\beta$ 1D-integrin construct. Fluorescent structures are bleached and recovery was followed over time to establish the data in Fig. 5F (20 seconds between frames. Width of field 53 $\mu$ m).
